# Supplementary material
Source: MDPI journal article supplement (https://www.mdpi.com/2073-4433/7/4/58)
Supplement: s1 [file s1]

# Supplementary Materials: Wintertime Residential Biomass Burning in Las Vegas, Nevada; Marker Components and Apportionment Methods.

*Atmosphere* 2016, 7, doi:10.3390/atmos7040058

Steven G. Brown, Taehyoung Lee, Paul T. Roberts and Jeffrey L. Collett, Jr.

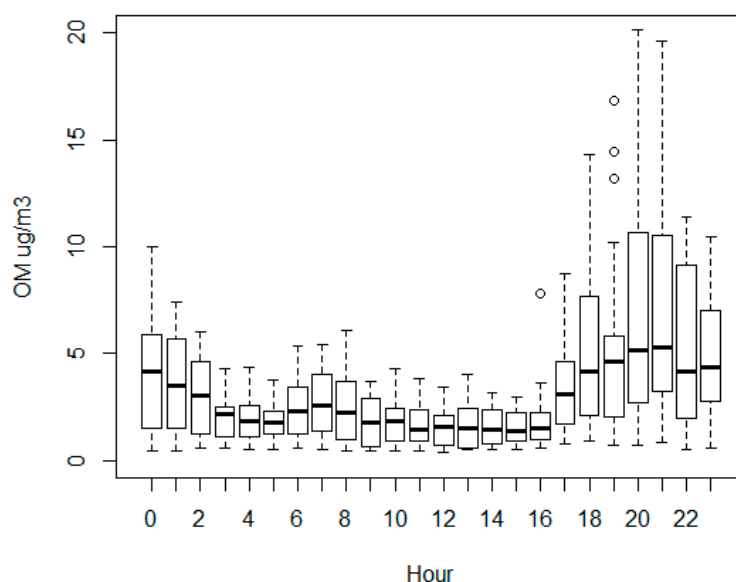

Figure S1. Diurnal box plot of HR-AMS OM ( $\mu\text{g}/\text{m}^3$ ).

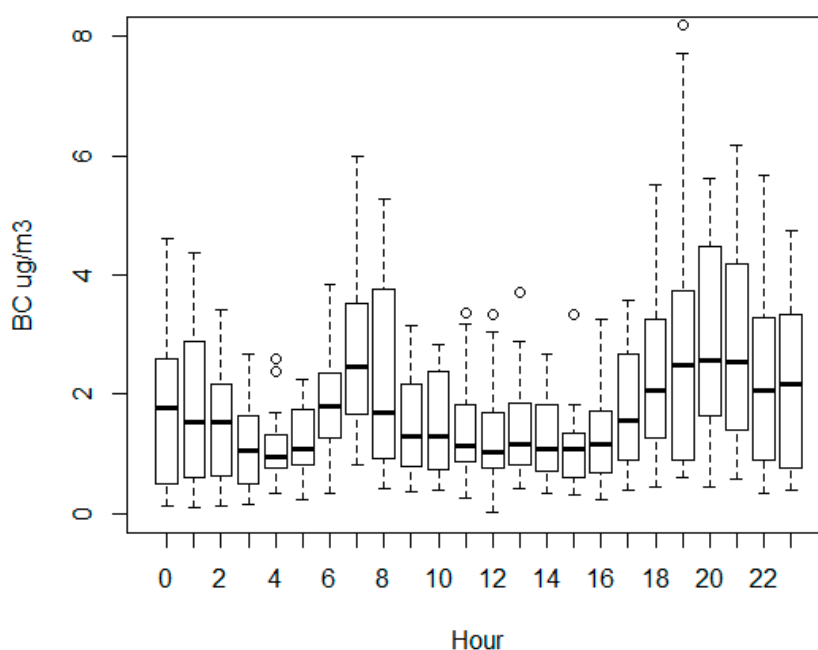

Figure S2. Diurnal box plot of Aethalometer BC ( $\mu\text{g}/\text{m}^3$ ).

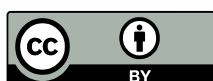

© 2016 by the authors; licensee MDPI, Basel, Switzerland. This article is an open access article distributed under the terms and conditions of the Creative Commons by Attribution (CC-BY) license (<http://creativecommons.org/licenses/by/4.0/>).
